# Supplementary material for: HIV-1 Superinfection Occurs Less Frequently Than Initial Infection in a Cohort of High-Risk Kenyan Women
Source: PLOS journal article supplement (doi:10.1371/journal.ppat.1003593), 2013-08-29

Known mixture1: 95% QA966  
5% QF927

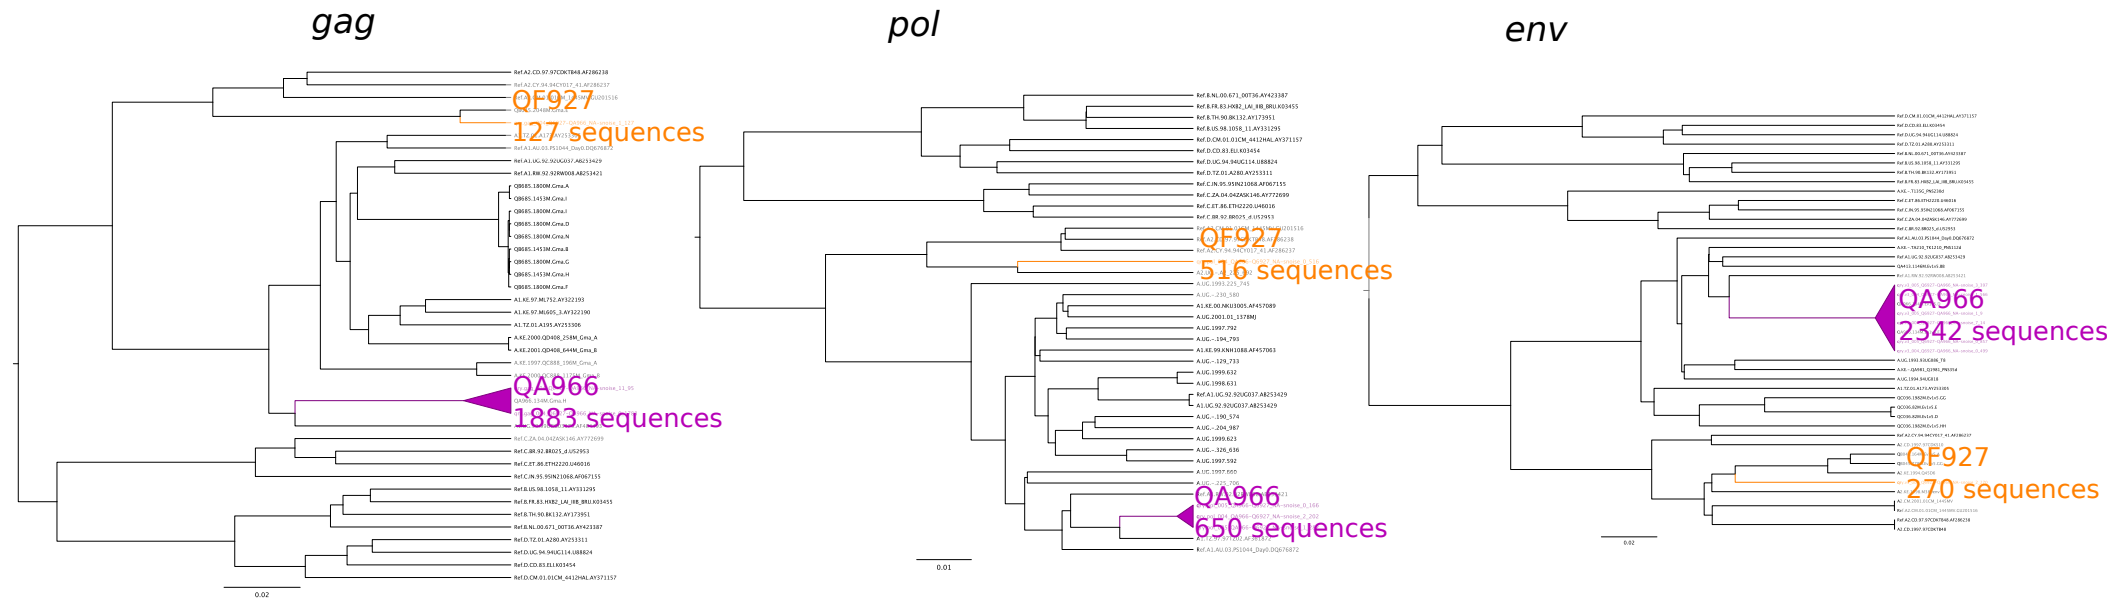

Known mixture2: 99% QA966  
1% QF927

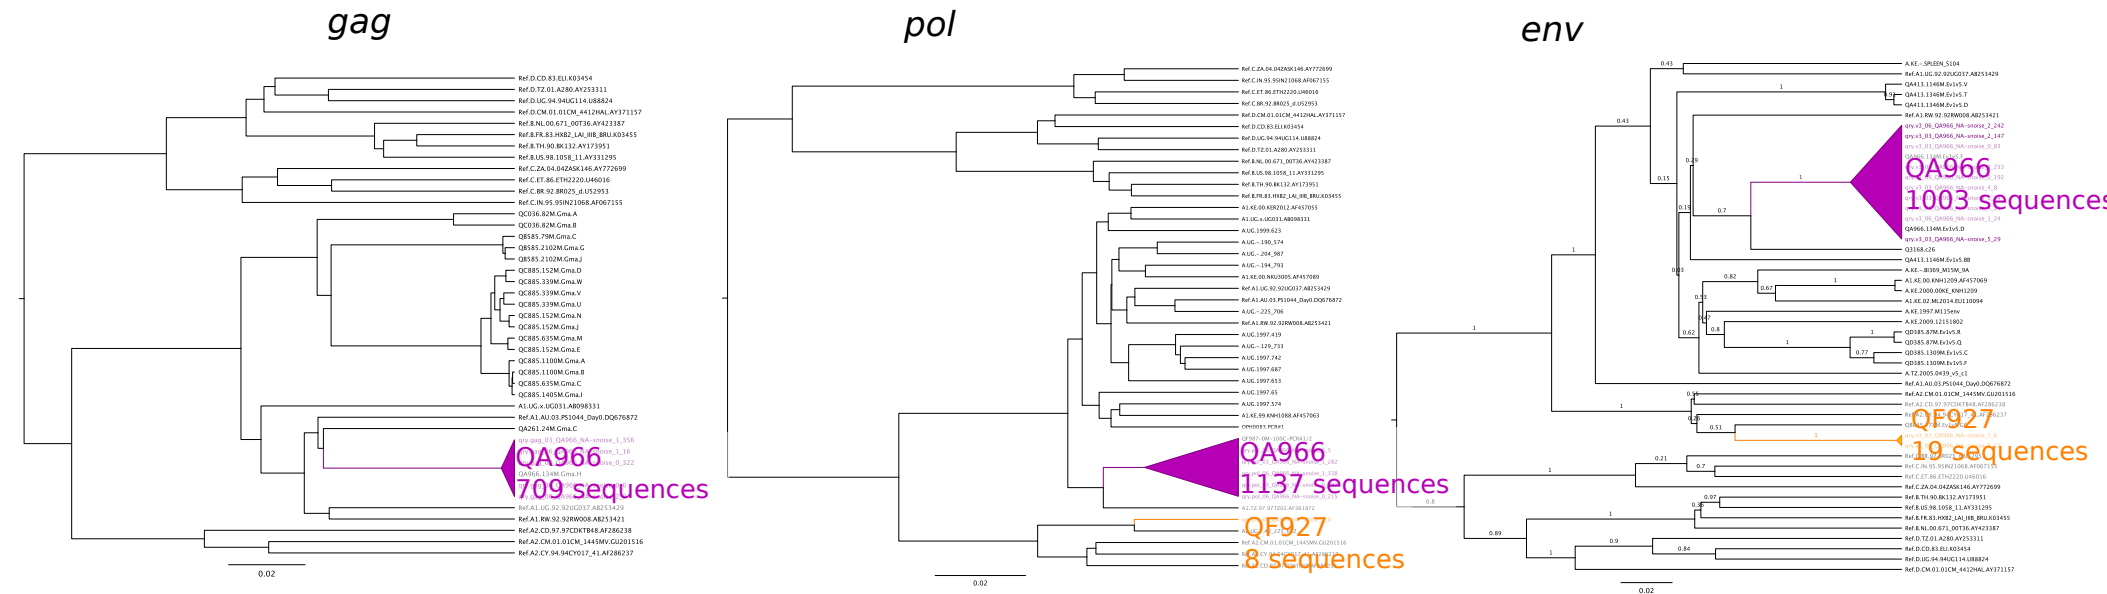

Supplement: S1 (10.1371/journal.ppat.1003593.s001) [file journal.ppat.1003593.s001]
