# Supplementary material for: HIV-1 Superinfection Occurs Less Frequently Than Initial Infection in a Cohort of High-Risk Kenyan Women
Source: PLoS Pathog. 2013 Aug 29;9(8):e1003593. doi: 10.1371/journal.ppat.1003593 (PMC3757054; doi:10.1371/journal.ppat.1003593)
Supplement: Table S1 — PCR primers and conditions. (XLSX) [file ppat.1003593.s004.xlsx]

## Sheet: Sheet1
RT-PCT
region	primer	sequence	Tm		RT-PCR cycle
gag	HIV-LTR-512_541-fwd	CACTGCTTAAGCCTCAATAAAGCTTGCCTT	60.3		45	60min
	HIV-gag-1500_1474-rev	TGCTATGTCACTTCCCCTTGGTTCTCT	59.7		94	2min
pol	HIV-pol-244_271-fwd	ACAGGAGCAGATACAGTATTAGAAG	54.4		94	30s	|
	HIV-pol-1597_1623-rev	AGTCTTTCCCCATATTACTATGCTTTC	55.2		50	30s	| 30x
v3	HIV-env-95	AAGGTAWCCTTTGAGCCAATTCC	53.5		68	2min	|
	HIV-env-96	GTATTRCAATAGAAAAATTCTCCTC	49.5-51.1		68	10min
					4	hold
PCR2
region	primer	sequence	Tm		PCR cycle gag & pol			PCR cycle v3
gag	HIV-gag-903_923-fwd	gcctccctcgcgccatcagXXXXXXXXCAGGGAGCTGGAAAGATTYGC	54-56		94	2min		94	2min
	HIV-gag-1421_1400-rev	gccttgccagcccgctcagTCTGCAGCTTCCTCATTGATGG	55		94	30s	|	94	30s	|
pol	HIV-pol-612_632-fwd	gcctccctcgcgccatcagXXXXXXXXAATTGGGCCTGAAAATCCATA	48.5		55	30s	| 30x	50	30s	| 30x
	HIV-pol-1147_1166-rev	gccttgccagcccgctcagAGTTCATAACCCATCCAAAG	47.7		68	1min	|	68	1min	|
v3	HIV-env-99	gcctccctcgcgccatcagXXXXXXXXTACATTATTGTGCYCCAGCTGG	53-55		68	10min		68	10min
	HIV-env-98	gccttgccagcccgctcagCTCCTCCACAATTAAARCTATG	49-53		4	hold		4	hold
		454 A
		454 B
		sample identifier
